# Supplementary material for: Monitoring surface water quality using social media in the context of citizen science
Source: Copernicus journal article supplement (doi:10.5194/hess-2016-359), 2016-07-25
Supplement: Supplementary file [file hess-2016-359-AC1-supplement.pdf]

# Monitoring surface water quality using social media in the context of citizen science

Hang Zheng<sup>1</sup>, Hong Yang<sup>1</sup>, Di Long<sup>1</sup>, Hua Jing<sup>1</sup>

<sup>1</sup>State Key Lab of Hydrosience and Engineering, Dept. of Hydraulic Engineering, Tsinghua Univ., Beijing 100084, China

5 *Correspondence to*: Hang Zheng (zhenghang@tsinghua.edu.cn)

**Abstract.** Surface water quality monitoring (SWQM) provides essential information for water environmental protection. However, SWQM is costly and is limited in terms of equipment and sites. The global popularity of social media and intelligent mobile devices with GPS and photograph functions provide immense opportunity for citizens to monitor surface water quality. This study aims to establish a method to monitor surface water quality using social media platforms. A WeChat-based application platform is built to collect water quality reports from volunteers. The key application functions and the methods for data washing and volunteer recruitment are discussed basing on the reports. The proposed framework and method can provide a mechanism to collect water quality data from citizens and offer a primary foundation for big data analysis in future research.

**Keywords.** Water quality; monitoring; social media; volunteered geographic information.

## 15 1 Introduction

Surface freshwater is a finite resource that is essential for human and ecosystem existence. An adequate quantity and quality of water are essential for sustainable development (Khalil and Ouarda, 2009). However, many surface water systems have been contaminated by treated or untreated wastewater discharged from domestic, industrial, and agricultural water users. Water quality has become an important component of the global water scarcity and water crisis.

20 The degradation of the surface water system has increased the need to determine the status of water quality to detect water pollution, thereby providing scientific guidance for water resources management (Wang et al., 2014). Water quality monitoring refers to the acquisition of quantitative and representative information on the physical, chemical, and biological characteristics of water bodies over time and space (Sanders et al. 1983; Strobl and Robillard 2008). Monitoring sites, frequency, variables and instruments, and trained/educated field personnel are required in a water quality monitoring

25 network. Evidently, establishing a surface water quality monitoring (SWQM) network in a broad area is costly (Horowitz, 2013). For example, the US Geological Survey runs the Mississippi River Basin monitoring network to address the gulf coast land loss and hypoxia. Currently, collecting a single sample at a site costs between US\$4,000 and US\$6,000. Analyses of various physical/chemical parameters add US\$1,500 to US\$2,000 more per sample (Horowitz, 2013). These costs limit the sample numbers/sites that can be monitored. The limited resources necessitate the monitoring program's installation of a

limited number of monitors on sites and samples at regular temporal intervals. These limitations reduce the capability of the monitoring program to disclose illegal pollution activities, such as hidden sewage dumping, which tend to occur in areas that are distant from the monitoring sites or at a time when no sampling has been conducted. For example, several Chinese industrial facilities dump sewage water discharge in rivers in midnight to avoid detection (Wei, 2013).

5 A participatory monitoring approach by citizens could fill the spatiotemporal gaps of the current monitoring network. Wei (2013) explained that two ordinary citizens recorded the sewage dumping in a river near their home in China from 2004 to 2007. Collecting samples and taking photos for four years enabled the two citizens to document dozens of instances of discoloured, foul-smelling, or warm water in the river. These voluntary records imply that citizens who are affected by the sewage discharge have a strong motivation to monitor and report the pollution. If there are more volunteer reporters (e.g., the  
10 two citizens) come forward, the more possibility to detect the hidden sewage dumping or pollution.

Water quality can be defined in terms of one variable to hundreds of compounds and for multiple usages (Khalil et al., 2010). To collect the evidence of hidden or midnight sewage dumping, what the citizens see and photograph appear to be effective. Citizens without professional equipment for water quality analysis can describe the physical characteristics of the water (e.g.,  
15 colour, smell, and temperature) to assess the water quality and disclose the pollution. Voluntary reporting is more flexible and effective and less costly compared with the traditional monitoring program operated by the government.

Thus, we argue that the volunteered geographic information (VGI) in the citizen science context provides a proximate sensing solution for water conservation issues. VGI has recently provided an interesting alternative to traditional authoritative information from mapping agencies and corporations (Goodchild and Glennon, 2010). VGI is also identified as  
20 “collaboratively contributed geographic information” (Bishr and Mantelas, 2008) in the context of participatory GIS (McCall, 2003), crowdsourcing GIS (Goodchild and Glennon, 2010), participatory planning (Seeger, 2008), and citizen science (Tulloch, 2008).

Citizen science, which is an indispensable means of combining ecological research with environmental education and natural history observation, ranges from community-based monitoring to the use of the Internet to “crowd source” various scientific  
25 tasks (i.e., from data collection to discovery) (Dickinson et al., 2012). Citizen science is the process whereby citizens are involved in science as researchers (Linda E. Kruger, Margaret A. Shanno, 2000). A citizen scientist is a volunteer who collects or processes data as a component of a scientific enquiry. Currently, citizen scientists participate in projects on climate change, invasive species, conservation biology, ecological restoration, water quality monitoring, population ecology, and different types of monitoring (Silvertown, 2009). VGI in the context of citizen science can be produced immediately and  
30 may determine environmental changes nearly rapidly as they occur. VGI is recognized as an innovative approach for an improved environmental governance by fostering accountability, transparency, legitimacy, and other dimensions of governance (McCall, 2003).

Several recent studies have provided the beginnings of the literature on this new approach. VGI has been applied to numerous research and business domains, particularly in detecting, reporting, and geo-tagging disasters, including

earthquakes (Kim, 2014), floods (Perez et al., 2015), hurricanes (Bunce et al. 2012; Virtual Social Media Working Group 2013), wildfires (Slavkovikj et al., 2014), tsunamis (Mersham, 2010), and storms (Lwin et al., 2015). VGI has successfully increased public knowledge on emergency situations and provided a novel and effective approach for disaster warning and management. (Sakaki, 2009) built an earthquake detection system in Japan by monitoring reports submitted by citizens  
5 through tweets. This system promptly detects earthquakes and sends e-mails to registered users within a minute (occasionally within 20 seconds) after earthquakes are detected. Notifications are delivered considerably faster than the announcements that are broadcasted by the Japan Meteorological Agency (JMA). On average, a JMA announcement is broadcasted 6 minutes after an earthquake. (Tang et al., 2015) descriptively evaluated the strengths, weaknesses, opportunities, and threats of VGI in managing the California drought in 2014 and provided a relatively overall description of  
10 VGI's role in disaster management. Apart from being a practical tool for events detection, VGI provides a new level of interaction, participation, and engagement to citizens for environmental governance (Werts et al., 2012). VGI also creates a new paradigm to investigate the self-aware, self-adapting, and self-organizing socio-technical system that combines people, mobile technology, and social media in a complex network of information (Perez et al., 2015).

One of the major obstacles for using VGI is its unknown quality. The general population is untrained to make the specific  
15 observations necessary in environmental management, and may intentionally or unintentionally supply erroneous information. Data quality is often unknown, and data sampling is frequently dispersed and unstructured. Similar concerns are often expressed regarding many other types of information provided by amateurs, thereby reflecting the profound association that society makes between qualifications, institutions, and trust (Goodchild and Glennon, 2010). Nevertheless, several grounds are used as basis for believing that the VGI quality can approach and even exceed that of authoritative sources  
20 (Goodchild and Glennon, 2010). Fore et al. (2001) trained volunteers to collect benthic macro invertebrates using professional protocols, and detected no significant difference between the field samples collected by volunteers and those collected by professionals. Citizen volunteers who are properly trained can collect reliable data and make stream assessments that are comparable with those made by professionals. Data collected by volunteers can supplement information used by  
government agencies to manage and protect rivers and streams (Fore et al., 2001).

25 Researchers have provided the literature on the theory and application of VGI, although studies on water pollution detection and water quality monitoring through VGI are limited. Training ordinary citizens on water sampling and quality analysis in the laboratory is costly. Meanwhile, citizens can observe and perceive polluted water and disclose water pollution activities. Volunteers can photograph the water, describe its physical characteristics, and share the information online. In this case, guidance is necessary to assist volunteers express what they observe in a logical, clear, and structured manner. A mechanism  
30 that can motivate volunteers to continuously produce data is also critical for VGI-based water quality monitoring.

Social media, such as Twitter, Facebook, Sina Weibo, and Tencent Weixin (the popular Chinese version of Twitter), is capable of guiding and providing incentives to volunteers through real-time online communication among volunteers. In recent years, social media has become a major communication channel in our society (Jiang et al., 2015). Social media refers to Internet-based applications that enable people to conduct online communications intended for interaction, community

input, and collaboration (Lindsay, 2011). Social media enables information sharing from multiple parties on computers and mobile devices, particularly through social networking sites (e.g., Facebook, YouTube, and Twitter), texting, chat rooms, discussion forums, and blogs (Tang et al., 2015). Social media builds on the ideological and technological foundations of Web 2.0, and enables the creation and exchange of user-generated content (Kaplan and Haenlein, 2010). The major functions of social media in the environmental management processes include one-way information sharing, two-way information sharing, situational awareness, rumor control, reconnection, and decision-making (Tang et al., 2015). Jiang et al. (2015) effectively monitored the dynamic changes of air quality in large cities by analyzing the spatiotemporal trends in geo-targeted social media messages with comprehensive big data filtering procedures. (Werts et al., 2012) developed an integrated framework for combining WebGIS technologies, data sources, and social media for future use in soil and water conservation. Werts et al. (2012) established a website called AbandonedDevelopments.com to collect VGI and detect the sediment pollution of abandoned structures in upstate South Carolina.

The advertisement, instruction, and guidance for water quality monitoring can be spread extensively and delivered to the potential volunteers' mobile devices directly through social media platforms. The observed sewage dumping or water pollution activities can be diffused rapidly in social media networks and call the government's attention. Social media provides the platform for volunteers to present, discuss, and communicate their criticism, anger, and solutions to the water pollution they observe. Communication and mutual encouragement provide a strong motivation for volunteers to monitor water quality and persistently share their observations. Furthermore, the discussion on the pollution activities reported in social media networks increases the opinion's pressure on the government to solve the problem. Government feedback can also be promptly disseminated to volunteers through social media. Timely dissemination of government feedbacks also motivates volunteers to continuously monitor water quality (see Fig. 1). Today, volunteers are equipped with digital cameras, GPS, digital maps, and other resources. Multiplying the resources of the average empowered citizen by the population of the city results in an astounding ability to create and share information (Goodchild and Glennon, 2010).

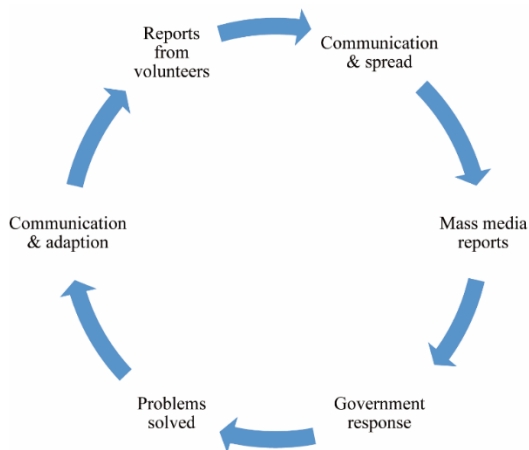

**Figure 1: Positive feedback ring for volunteer's motivation.**

This study aimed to establish an approach to monitor surface water quality through volunteered citizen scientists. An App platform basing on social media was built to collect the water quality information. The application of the App suggested new methods to monitor water pollution using VGI and social media in the future. This paper is organized as follow. Methodology is presented in Section 2. All monitoring reports obtained across China are displayed in Section 3. The data quality and motivation of volunteers are discussed in detail in Section 4. Conclusions drawn from this study are given in Section 5.

## **2 Methodology**

A methodological framework was established to: (1) Collect sensory data of surface water quality from the volunteer citizens, who describe and photograph the water that they pass by or are close to. Descriptions and photos are sent to a data centre from the mobile devices of volunteers through a specific application in the social media platform. (2) Detect the illegal/hidden sewage dumping that the official monitoring network hardly covers. Once sewage dumping reports from the volunteers are submitted, the data centre will transfer them to the mass media and water authorities after the credibility check.

### **2.1 Data type**

Four indicators were adopted to describe the physical characteristics of water quality (see Figure 2). A total of 11 water color options were provided for volunteers to choose from, including red, orange, yellow, green, cyan, blue, purple, milky, pink, black, and crystal. The second indicator is smell, which is quantified by the ranking scores made by volunteers. The volunteer is supposed to rank the smell of the sample from 0 to 10, with 0 implying a lack of odour and 10 implying a foul-smelling sample. The third indicator is turbidity in which a score of 10 means that the water is non-transparent and a score of 0 represents transparency. The fourth indicator represents the floating objects or floats on the water. If the water is completely covered by oil, forth, plastics, and rubbish, among others, the floats score is 10. By contrast, a score of 0 means no floating object is present. The last item is an integrated assessment on the water quality, ranking from worst, very bad, bad, good, to excellent. Volunteers evaluate the water quality based on their perception.

### **2.2 App in social media platform**

The Tsinghua Environment Monitoring Platform (TEMP, <http://www.thuhjjc.com/>) application was built based on WeChat public accounts. WeChat is a mobile text and voice messaging communication service developed by Tencent in China, and was first released in January 2011. WeChat is one of the largest messaging applications in China. As of May 2016, WeChat has over a billion existing accounts and 700 million active users (Intelligence, 2016). WeChat provides text messaging, hold-to-talk voice messaging, broadcast messaging, video conferencing, photo and video sharing, and location sharing (Tencent, 2016). Moreover, WeChat enables users to register a public account, thereby enabling them to push feeds to subscribers, interact with subscribers, and provide them with services. Public accounts can be used as a service platform, such as hospital

pre-registrations, visa renewal, or credit card service (Wikipedia, 2016). WeChat provides functions for users to post images and texts, share music and articles, as well as comment and “like” in the Moments. Only the users' friends will be able to view the contents and comments of their Moments. In addition, WeChat supports payment and money transfer, thereby enabling users to use peer-to-peer transfer and electronic bill payment (Tencent, 2016).

5 Volunteer reporters should install WeChat on their mobile devices and log in the TEMP through their WeChat accounts. Through TEMP, volunteers are able to submit reports together with the GPS position where the reported water is located. The location can either be automatically extracted from the devices or be input manually by the reporters. Volunteers can tweet the reports to their friends, and post and comment on them in the Moments. TEMP also provides a function for ranking volunteers according to their contributions. Awards, such as cash through WeChat Payment, will be offered to top-ranking  
10 reporters. A computer-based website is also provided for the public to view and download the reports (See TEMP, <http://www.thuhjic.com>.)

### **2.3 Volunteer recruitment**

Two modes were used for volunteer recruitment. In Mode 1, TEMP was popularized from a central group to the general public (see Fig. 2). The university students recruited for the present study post the address of the TEMP two-dimension code  
15 in Moments and Chat Groups after they log in the TEMP through their WeChat accounts. Their friends who are interested in SWQM will click the address or scan the two-dimension code, and then be directed to TEMP. If these people log in and submit reports, they will be involved and contacted by the TEMP. They can receive the message from TEMP and be encouraged to submit more reports and attract numerous volunteers to be involved. TEMP is not able to control when and where the monitoring reports come from. Data was scattered in Mode 1.

20 In Mode 2, a group of professional citizens were recruited to monitor the water quality in targeted sites. Professionals who work for environmental authorities and organizations were interviewed and convinced to register in TEMP. They were required to monitor water bodies that they are familiar with and regularly submit the reports through TEMP. In Mode 2, volunteers were recruited and data were instantly collected before an extensive range of citizens who were involved through Mode 1.

### **25 2.4 Data analysis**

A method was established to quantitatively analyse monitoring reports. Smell, turbidity, floats, and integrated assessment reported by the volunteers were quantified and normalized between 0.0 and 1.0 according to their ranking scores. Water colour was used for data cleansing and rumour control through cross validation between the descriptions and photos. Table 1 shows the indicators and their value ranges.

30

**Table 1: Normalization of indicators**

| Report items          | Indicator | Data type          | Qualifications            |
|-----------------------|-----------|--------------------|---------------------------|
| Water color           | $C$       | Text               | None                      |
| Smell                 | $S$       | Score from 0 to 10 | 1.0–0.0                   |
| Turbidity             | $T$       | Score from 0 to 10 | 1.0–0.0                   |
| Floats                | $F$       | Score from 0 to 10 | 1.0–0.0                   |
| Integrated assessment | $I_a$     | Grand from 1 to 6  | 1.0, 0.75, 0.5, 0.25, 0.0 |

The value of smell, turbidity, and floats ranges from 1.0 to 0.0. The integrated assessment's indicator is normalized across 1.0, 0.75, 0.5, 0.25, and 0.0, which correspond to the five grades of water quality assessment (i.e., excellent, good, bad, very bad, and worst).

$$Q = (P_a + I_a)/2 = [(S + T + F)/3 + I_a]/2, \quad (1)$$

where  $Q$  represents the report's water quality assessment result. A preliminary assessment ( $P_a$ ) is calculated through the average of  $S$ ,  $T$ , and  $F$ . The average value of  $S$ ,  $T$  and  $F$  ( $P_a$ ) provides an indicator based assessment of the water quality.  $I_a$  is an integrated assessment in the reports based on reporters' overall perception of the water. It is higher than the individual sense based indicators  $S$ ,  $T$ , and  $F$ . The water sample's smell, turbidity, and floats were used in the calculation to enhance the assessment's credibility.

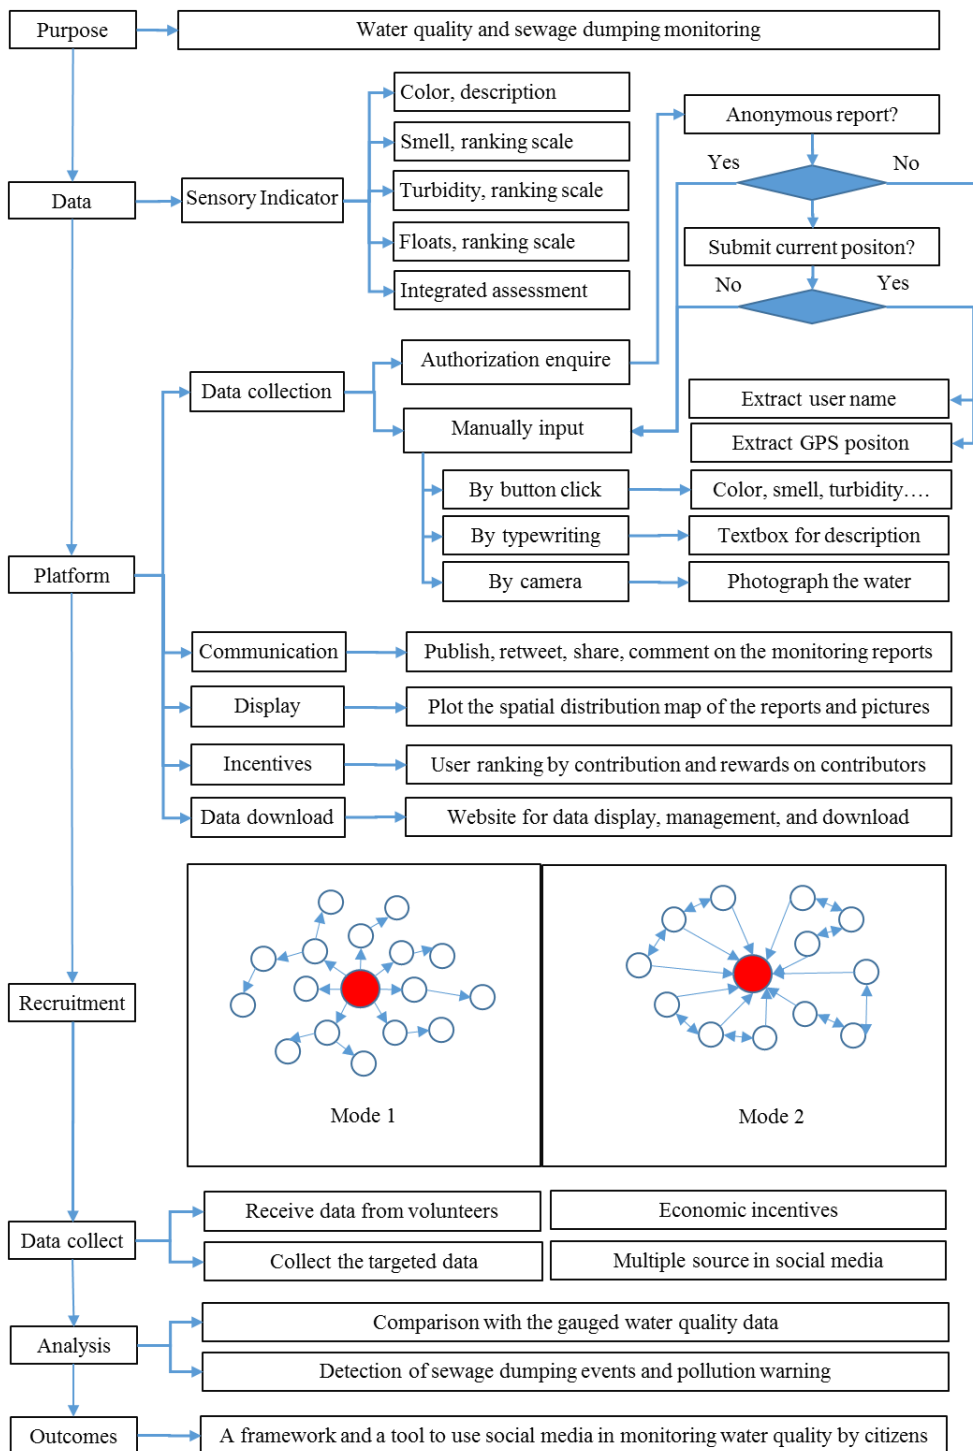

**Figure 2: Framework of monitoring water quality by VGI and social media.**



### 3 Results

TEMP received a total of 265 reports from volunteers in China between 12 October 2015 and 30 May 2016. Out of the 265 reports, 172 were validated in the present study.

Table 2 shows the overview of 172 validated reports across 29 provinces and municipalities in China. Henan Province and Beijing municipality have about 30 reports. The reports from Henan Province were contributed by Henan-based professional volunteers working in the Yellow River Conservation Commission. The reports from Beijing were mainly from the students of Tsinghua University, where the research group of the present study is located. A total of 23 provinces have under 10 reports. A total of 14 provinces have only 1 report during the period. Meanwhile, no reports were provided from Tibet, Xinjiang, Hainan, Taiwan, Macau, and the South China Sea.

10 **Table 2: Number of reports across China**

| No.   | Provinces    | Number of reports |           |              | Assessment | No. | Provinces | Number of reports |           |              | Assessment |
|-------|--------------|-------------------|-----------|--------------|------------|-----|-----------|-------------------|-----------|--------------|------------|
|       |              | Total             | Anonymous | Photographed |            |     |           | Total             | Anonymous | Photographed |            |
| 1     | Henan        | 34                | 19        | 18           | 0.74       | 18  | Guangdong | 1                 | 1         | 0.75         |            |
| 2     | Beijing      | 29                | 23        | 4            | 0.59       | 19  | Guangxi   | 1                 | 1         | 0.77         |            |
| 3     | Jiangxi      | 24                | 4         | 4            | 0.69       | 20  | Guizhou   | 1                 | 1         | 0.77         |            |
| 4     | Shandong     | 16                | 1         | 16           | 0.61       | 21  | Hebei     | 1                 | 1         | 0.73         |            |
| 5     | Shanghai     | 15                | 1         | 7            | 0.74       | 22  | Hunan     | 1                 | 1         | 0.58         |            |
| 6     | Chongqing    | 12                | 6         | 11           | 0.57       | 23  | Jilin     | 1                 | 1         | 0.78         |            |
| 7     | Fujian       | 6                 | 3         | 2            | 0.88       | 24  | Neimeng   | 1                 | 1         | 0.33         |            |
| 8     | Gansu        | 4                 | 2         | 3            | 0.75       | 25  | Ningxia   | 1                 | 1         | 0.80         |            |
| 9     | Yunnan       | 4                 | 1         | 3            | 0.90       | 26  | Shaanxi   | 1                 | 1         | 0.75         |            |
| 10    | Shanxi       | 3                 | 2         | 2            | 0.74       | 27  | Sichuan   | 1                 | 1         | 0.78         |            |
| 11    | Tianjin      | 3                 | 3         | 2            | 0.80       | 28  | Zhejiang  | 1                 | 1         | 0.58         |            |
| 12    | Hubei        | 2                 | 0         | 2            | 0.64       | 29  | Hongkong  | 1                 | 1         | 1.00         |            |
| 13    | Jiangsu      | 2                 | 1         | 2            | 0.77       | 30  | Xinjiang  | /                 | /         | /            |            |
| 14    | Liaoning     | 2                 | 1         | 1            | 0.70       | 31  | Tibet     | /                 | /         | /            |            |
| 15    | Qinghai      | 2                 | 1         | 1            | 0.88       | 32  | Hainan    | /                 | /         | /            |            |
| 16    | Anhui        | 1                 | 1         | 0            | 0.80       | 33  | Taiwan    | /                 | /         | /            |            |
| 17    | Heilongjiang | 1                 | 1         | 0            | 0.55       | 34  | Macau     | /                 | /         | /            |            |
| Total |              |                   |           |              |            |     |           | 172               | 82        | 83           |            |

Table 2 shows that 82 out of 172 reports were submitted without the WeChat users' names indicated. TEMP users were allowed to submit their reports anonymously. A few volunteers were concerned about their privacy; thus, they submitted reports anonymously. The number of anonymous reports implies the necessity of setting up an anonymous function in TEMP because volunteers care about their privacy when they disclose the water pollution activities around them. A total of 83

reports out of 172 had photos of water. Photos significantly increased the credibility of the reports by providing substantial information for water quality analysis. However, 50% of the reports had no photos. The volunteers were also concerned about the charge of the Internet data flow, through which they upload the photos without Wi-Fi. Additional incentive measures are required to encourage volunteers to upload the photos of water. Figure 3 and Figure 4 show the number of reports and anonymous reports and photograph reports, respectively.

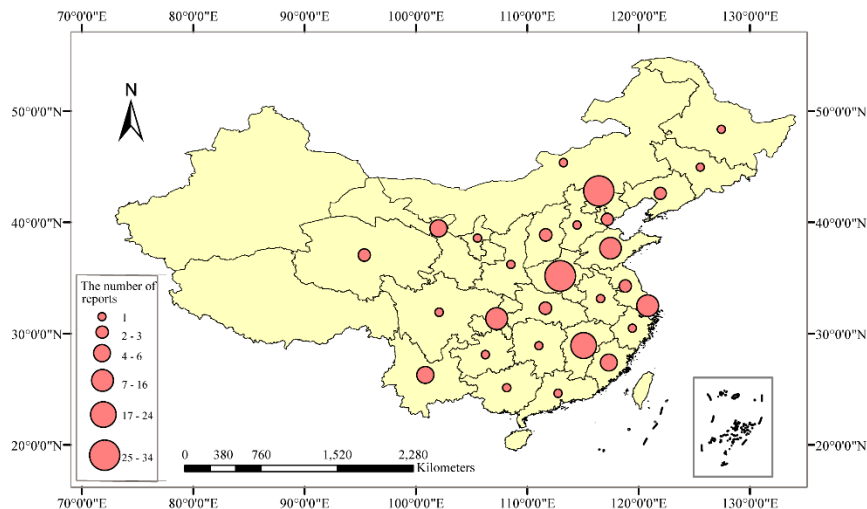

**Figure 3. Distribution of the reports across the provinces and cities in China.**

Note: No reports were provided from Tibet, Xinjiang, Hainan, Macau, Taiwan, and South China Sea.

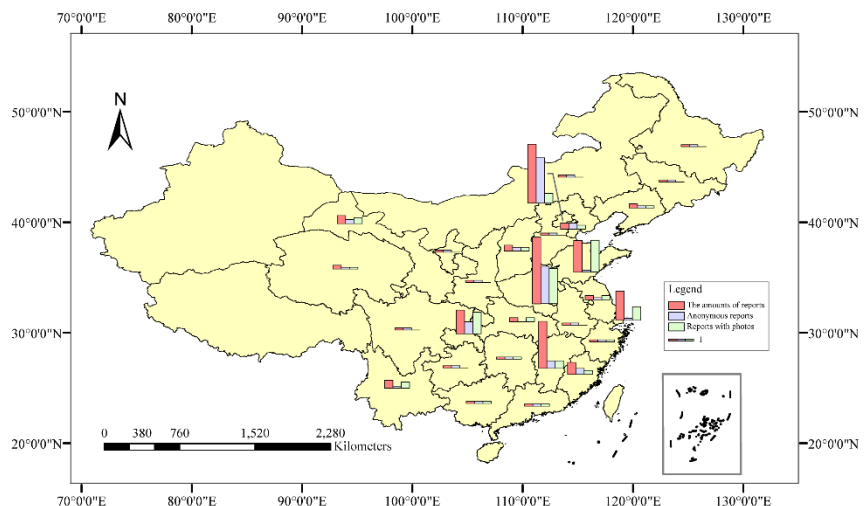

**Figure 4. Distribution of anonymous reports and photograph reports.**

Note: No reports were provided from Tibet, Xinjiang, Hainan, Macau, Taiwan, and South China Sea.

Table 2 shows the water quality assessment results. The assessment result of each province was calculated based on the volunteered reports from that province (see. Equation (1)). The assessment is, however, unable to represent the overall situation of the surface water quality in a region because the coverage and frequency of the reports is insufficient at the current stage. Meanwhile, TEMP provides a practical tool for citizens to monitor the rivers and the lakes around them. An increasing number of volunteers will be involved in the future. The surface water quality of a region or a river basin can be depicted once enough volunteers and sufficient reports and photos are provided.

Table 3 shows three photograph reports. The algal bloom and water surface foam are shown in the photos. In Report 1, the volunteer submitted a photo of the river in Tsinghua University, Beijing, China. The river is polluted by the domestic sewage and suffers from eutrophication. Report 2 represents the water quality in an unidentified river located in Fei Town, Linyi City, Shandong Province. Photo 2 shows that the water surface is covered by algae and rubbish. The reporter assessed the water quality as very bad. Report 3 is from a coastal area, namely, Tianjing City. The reporter identified the color of the water as black and assessed its quality as bad. White foam was observed on the water surface, thereby implying that the quality of water is not good.

Among the 83 photos collected by TEMP during the period, the volunteers failed to monitor the scene, wherein the dumped sewage water was flowing to the river or lake. Sewage water dumping in China generally occurs at night and in a hidden place, which is hardly found by the volunteers. If there are sufficient volunteers aiming to disclose the hidden sewage dumping in a region, then the pollution activities can be determined by TEMP based on its current functions.

**Table 3: Examples of reports for pollution disclosure**

| No.      | 1                                                                                 |       |           |        |         | 2                                                                                  |       |           |        |         | 3                                                                                   |       |           |        |         |
|----------|-----------------------------------------------------------------------------------|-------|-----------|--------|---------|------------------------------------------------------------------------------------|-------|-----------|--------|---------|-------------------------------------------------------------------------------------|-------|-----------|--------|---------|
| Report   | Color                                                                             | Smell | Turbidity | Floats | Assess. | Color                                                                              | Smell | Turbidity | Floats | Assess. | Color                                                                               | Smell | Turbidity | Floats | Assess. |
|          | Green                                                                             | 3.0   | 5.0       | 7.0    | VB      | Green                                                                              | 3.0   | 6.0       | 5.0    | VB      | Black                                                                               | 0.0   | 7.0       | 7.0    | B       |
| Photo    | 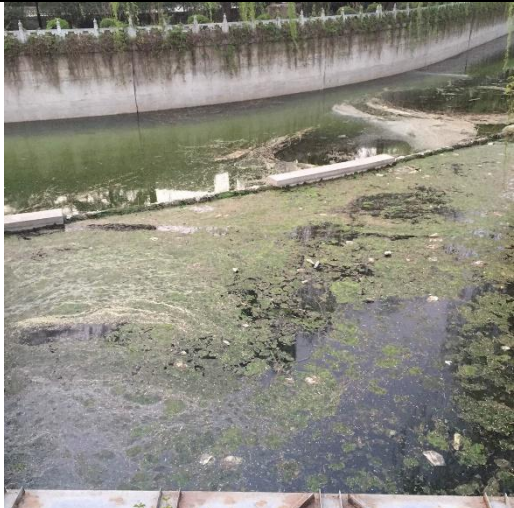 |       |           |        |         |  |       |           |        |         |  |       |           |        |         |
| Date     | April 10, 2016                                                                    |       |           |        |         | April 15, 2016                                                                     |       |           |        |         | May 1, 2016                                                                         |       |           |        |         |
| Location | Tsinghua University, Beijing City, China                                          |       |           |        |         | Fei Town, Linyi City, Shandong Province                                            |       |           |        |         | New coastal area, Tianjin City, China                                               |       |           |        |         |

Note: B means bad; VB means very bad.

## 5 Discussion

The present study aimed to develop a method to monitor surface water quality through volunteer citizens using a social media application. A framework was established to guide the application design, volunteer recruitment, data collection, and report analysis. The TEMP application was built based on the social media platform called WeChat. Using the application, TEMP users can describe and photograph the water in rivers and lakes following the TEMP instructions. Moreover, users can disclose the surface water pollution activities that affect their living and health.

A total of 172 validated reports were analyzed in this study. These reports are from 121 volunteers across 29 provinces and cities in China. The water quality on sites was assessed by the volunteers using their sense organs, particularly through their observations on water smell, turbidity, and floats on the water. People's sense on water quality varies, and different people may provide different assessment reports on water from the same site. Comparing the assessment results across different sites is difficult because the citizens' reports are subjective somehow. Meanwhile, this situation will change if numerous volunteers and extensive reports are obtained. Data can be generated through satellite and aerial remote sensing, sensor systems streaming, informal online platforms, and other popular social media, such as Facebook and Twitter. Thereafter, the big data method (Hampton et al., 2013) can be applied to improve the accuracy of water quality monitoring if high data density is present. Citizen scientists contribute to environmental or ecological data archive expansion by participating in collaborative projects (e.g., eBird or Wikipedia) (Kelling et al., 2009). These efforts are dedicated to addressing critical environmental challenges across spatiotemporal scales (Cha and Stow, 2015). The present study provides an approach for collecting citizen reports on water quality, which is the first step in applying the big data method in environmental governance (Perez et al. 2015; McCall 2003).

The credibility of the reports is the major concern of the present study. Regardless of the water quality assessment by citizens, identifying whether the reports are real and whether the volunteers generated the reports based on their observations is necessary rather than on false statements or rumours. Rumour control is significant when a water pollution activity is detected and reported in social media (Tang et al., 2015). The current study applied three criteria to validate the reports, including: (1) the report with the exact GPS location information of the site is regarded as credible. The sites' GPS information is automatically abstracted from the reporters' mobile devices when they submit the reports. (2) If reports are submitted several times during a short period, and most of these reports are from the same volunteer on the same site, then the reports are deemed to have low credibility. These reports may be test reports from new volunteers. (3) Reports with photos are the most credible. A total of 265 reports are cleansed following these criteria, and 172 were validated in the present study. Further cross validation among different reports can be applied if huge amounts of data in a region are present. Questionable reports can be cross-validated by the other volunteers' reports on the same site, and by time if the spatiotemporal density of the reports is sufficiently high.

The volunteers' motivation to consciously submit data is another major concern of the present study. Various VGI studies reveal that the volunteers' motivation is a key factor to the VGI program's success (Werts et al., 2012). Coleman et al. (2009), as cited in (Werts et al., 2012, Page 817) revealed that the key motivators include altruism, professional or personal interest, intellectual stimulation, protection or enhancement of a personal investment, social reward, enhanced personal reputation, outlet for creative and independent self-expression, and pride of location, among others. Several citizens may be motivated by the perceived instrumentality in promoting change (Hertel et al., 2003). Budhathoki et al. (2010), as cited in (Werts et al., 2012, Page 817), regarded fun, learning, and instrumentality as primary motivators for geographic information contributors, thereby noting that "when contributors see their data appear visually on maps, they receive deep satisfaction." In the present study, the core members in the chat group who lead the communication and remind the volunteers are beneficial in motivating the contributors. Moreover, certain economic incentives are quite effective in increasing the number of contributors and their contributions. Figure 5 shows the number of volunteers involved in the present study. The TEMP application was built and has been tested since April 2015. After the application development and testing, TEMP was promoted by the faculty, staff, and students at Tsinghua University through their WeChat Moments. The number of users steadily increased until the first official launch of TEMP in the ceremony conference for the establishment of the Tsinghua Remote Sensing and Big Data Research Centre (<http://hydrosky.org/Newscon/index/id/581/aid/544445113>) in October 2015, when a sharp increase occurred. Professionals and the public related to the research centre were observed to have registered in TEMP, thereby facilitating the increase in the number of users in October 2015. After the increase in the number of users, TEMP users continuously promoted and advertised the platform in their WeChat Moments, and attracted the involvement of additional users. The number of reports increased gradually because of the lack of incentives to the volunteers before March 2016.

In March 2016, Mode 2 was adapted to recruit volunteers working in the Yellow River Conservation Commission and students in the universities in Beijing. Several volunteer chat groups were established in WeChat, and a core member was assigned in each group to lead the communication and remind users to submit reports. Consequently, the number of reports substantially increased after these activities. Since April 2016, economic incentives and rewards were adapted. The core members in the chat groups gave the "Red Packet" money through WeChat Payment. The core members transferred the money in the chat groups, which was normally 100 RMB each time in a chat group. The "Red Packet" money can be obtained and shared by dozens of members, who point the "Red Packet" money picture on the screen before others do. The winner receives a random share of the total "Red Packet" money. The members who win the money in the chat groups were considerably motivated to submit reports, tended to invite their friends in, and encouraged them to submit data. After April 2016, these economic incentives continuously motivated the volunteers and increased the number of reports.

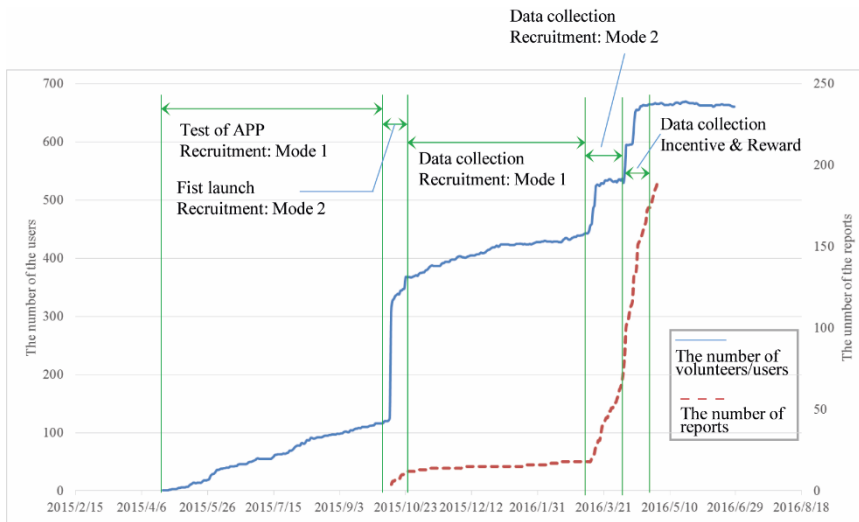

**Figure 5: Increase in the number of reports and reporters.**

The economic rewards were also provided in accordance with the volunteers’ contributions, rather than their finger speed of pointing the “Red Packet” money picture on their mobile devices’ screen. Figure 6 shows the distribution of the reports versus reporters. A total of 20 out of 39 reporters (excluding the anonymous reporters) submitted only 1 report each during the period. There were 3 reporters whose reports’ number was larger than 10. A targeted reward by WeChat Payment was provided to the reporters with top-ranking submissions among all TEMP users since April 2016.

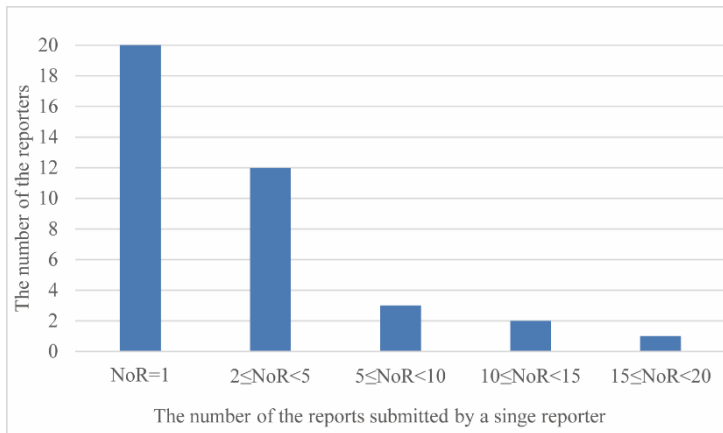

**Figure 6: Distribution of the reports versus reporters.**

10 Further research related to the present study may include efforts to collect additional data and recruit many active volunteers. Additional data sources, such as Twitter, Facebook, and Sina Weibo, could be involved (Jiang et al., 2015). People tend to post or tweet a text or a picture in social media to complain water pollution, and represent their lives to their friends, if they see a dirty river or lake (Kaplan and Haenlein, 2010). In this case, social media users do not intend to disclose a water pollution activity. However, users inadvertently provide the data for water quality monitoring. The text and photos about

water quality from Twitter, Facebook, and Sina Weibo can provide high density and massive data because of the presence of millions of active users in these social media platforms. This process saves the effort to recruit and motivate volunteers, although the data collected tend to be unstructured (Poser and Dransch, 2010).

TEMP facilitates the efficient method of contacting and guiding volunteers to submit the required structural report and data.

- 5 However, a considerable effort is necessary to recruit and motivate them. Economic incentives are demonstrated to be effective in the present study. Meanwhile, the use of incentives appears to be an unsustainable method. Cooperation with non-government organizations (NGOs) that are focused on environmental protection may provide another approach for volunteer recruitment. NGO members should be interested in TEMP and have an enduring and strong motivation to disclose water pollution activities.

## 10 **6 Conclusion**

A methodological framework to monitor surface water quality using social media is established in the present study, including the selection of the water quality indicators, application design guide, volunteer recruitment methods, data collection, cleansing, and analysis. The TEMP application was established based on a popular social media platform in China called WeChat. TEMP enables registered users to submit their descriptions and photos on rivers or lakes anonymously  
15 or non-anonymously with the automatically extracted GPS information of the sites from their mobile devices.

A total of 265 reports across 29 provinces and cities were received by TEMP between October 12, 2015 and May 30, 2016. Out of the 265 reports, 172 were validated and analyzed. The distribution analysis of reports across China indicates that the anonymous and photograph functions are quite essential for TEMP. Over 48% of the 172 reports are from anonymous users. Accordingly, people care about their privacy when they try to disclose a water pollution activity occurring within their  
20 vicinity. A total of 83 photos of rivers and lakes were collected through TEMP, and these photos provide extensive information for pollution detection.

- Data quality and the users' motivation are also discussed. Three criteria were applied for data cleansing based on the location, time, and photos in the reports. Two modes for volunteer recruitment were used. Mode 2 is considerably suitable for increasing the number of volunteers within a short period. The economic incentive mechanism to targeted volunteers are also  
25 implemented in the present study. Economic incentives are effective in motivating the volunteers to contribute data under the guidance from the core members of the chat groups.

Further research should include collecting more data and recruiting more motivated volunteers. The unpremeditated data referring to water quality from Twitter, Facebook, and Sina Weibo should be abstracted to increase the volume of data. The big data method is expected to be used with the availability of sufficient data.



## **Data availability**

The data underlying this research can be accessed publicly. All the data can be download from the website [www.thuhjjc.com](http://www.thuhjjc.com). This is a website established by the authors for displaying and downloading the data from TEMP platform.

## **5 Author Contribution**

Dr. Hang Zheng designed the framework of this study, analysed the data and prepared the manuscript with contributions from all co-authors. Professor Hong Yang designed the interface of TEMP platform and contributed to the Discussion Section. Dr. Di Long carried out the data collection. Mr. Jing Hua developed main functions of the TEMP platform through computer programming.

## **10 Competing interests**

The authors declare that they have no conflict of interest.

## **Acknowledge**

This research is supported by National Natural Science Foundation of China (51479089) and (51323014); 2014 Chinese Ministry of Water Resource Program (201401031); the 13th Five Year Research Program from the Ministry of Science and  
15 Technology, China (SQ2016YFSF020003).

## **References**

- Bishr, M. and Mantelas, L.: A trust and reputation model for filtering and classifying knowledge about urban growth, *GeoJournal*, 72(3-4), 229–237, doi:10.1007/s10708-008-9182-4, 2008.
- Budhathoki, N. R., NedovicćBudicć, Z. and Bruce, B. C.: An Interdisciplinary Frame for Understanding Volunteered  
20 Geographic Informaion, *Geomatica*, 64(1), 11 - 26, 2010.
- Bunce, S., Partridge, H. and Davis, K.: Exploring information experience using social media during the 2011 Queensland Floods: a pilot study, *Aust. Libr. J.*, 61(1), 34–45, doi:10.1080/00049670.2012.10722300, 2012.
- Cha, Y. and Stow, C. a: Mining web-based data to assess public response to environmental events., *Environ. Pollut.*, 198C, 97–99, doi:10.1016/j.envpol.2014.12.027, 2015.

- Coleman, D. J., Georgiadou, Y., Labonte, J., Observation, E. and Canada, N. R.: Volunteered Geographic Information : The Nature and Motivation of Producers, *Int. J. Spat. Data Infrastructures Res.*, 4, 332 – 358, doi:10.2902/1725-0463.2009.04.art16, 2009.
- 5 Dickinson, J. L., Shirk, J., Bonter, D., Bonney, R., Crain, R. L., Martin, J., Phillips, T. and Purcell, K.: The current state of citizen science as a tool for ecological research and public engagement, *Front. Ecol. Environ.*, 10(6), 291–297, doi:10.1890/110236, 2012.
- Fore, L. S., Paulsen, K. and O’Laughlin, K.: Assessing the performance of volunteers in monitoring streams, *Freshw. Biol.*, 46(1), 109–123, doi:10.1046/j.1365-2427.2001.00640.x, 2001.
- 10 Goodchild, M. F. and Glennon, J. A.: Crowdsourcing geographic information for disaster response: a research frontier, *Int. J. Digit. Earth*, 3(3), 231–241, doi:10.1080/17538941003759255, 2010.
- Hampton, S. E., Strasser, C. A., Tewksbury, J. J., Gram, W. K., Budden, A. E., Batcheller, A. L., Duke, C. S. and Porter, J. H.: Big data and the future of ecology, *Front. Ecol. Environ.*, 11(3), 156–162, doi:10.1890/120103, 2013.
- Hertel, G., Niedner, S. and Herrmann, S.: Motivation of software developers in open source projects: An Internet-based survey of contributors to the Linux kernel, *Res. Policy*, 32(7), 1159–1177, doi:10.1016/S0048-7333(03)00047-7, 2003.
- 15 Horowitz, A. J.: A review of selected inorganic surface water quality-monitoring practices: Are we really measuring what we think, and if so, are we doing it right?, *Environ. Sci. Technol.*, 47(6), 2471–2486, doi:10.1021/es304058q, 2013.
- Intelligence, B.: WeChat pay fees kick in, *Bus. Insid.* [online] Available from: <http://www.businessinsider.com/wechat-pay-fees-kick-in-2016-5/?r=AU&IR=T> (Accessed 4 May 2016), 2016.
- 20 Jiang, W., Wang, Y., Tsou, M.-H. and Fu, X.: Using Social Media to Detect Outdoor Air Pollution and Monitor Air Quality Index (AQI): A Geo-Targeted Spatiotemporal Analysis Framework with Sina Weibo (Chinese Twitter), *PLoS One*, 10(10), e0141185, doi:10.1371/journal.pone.0141185, 2015.
- Kaplan, A. M. and Haenlein, M.: Users of the world, unite! The challenges and opportunities of Social Media, *Bus. Horiz.*, 53(1), 59–68, doi:10.1016/j.bushor.2009.09.003, 2010.
- 25 Kelling, S., Hochachka, W. M., Fink, D., Riedewald, M., Caruana, R., Ballard, G. and Hooker, G.: Data-intensive Science: A New Paradigm for Biodiversity Studies, *Bioscience*, 59(7), 613–620, doi:10.1525/bio.2009.59.7.12, 2009.
- Khalil, B. and Ouarda, T. B. M. J.: Statistical approaches used to assess and redesign surface water-quality-monitoring networks., *J. Environ. Monit.*, 11(11), 1915–1929, doi:10.1039/b909521g, 2009.
- Khalil, B., Ouarda, T. B. M. J., St-Hilaire, A. and Chebana, F.: A statistical approach for the rationalization of water quality indicators in surface water quality monitoring networks, *J. Hydrol.*, 386(1-4), 173–185, doi:10.1016/j.jhydrol.2010.03.019, 2010.
- 30 Kim, T.: Observation on copying and pasting behavior during the Tohoku earthquake: Retweet pattern changes, *Int. J. Inf. Manage.*, 34(4), 546–555, doi:10.1016/j.ijinfomgt.2014.03.001, 2014.

- Linda E. Kruger, Margaret A. Shanno: Getting to Know Ourselves and Our Places Through Participation in Civic Social Assessment, *Soc. Nat. Resour.*, 13(5), 461–478, doi:10.1080/089419200403866, 2000.
- Lindsay, B. R.: Social Media and Disasters: Current Uses, Future Options and Policy Considerations., *Congr. Res. Serv. Reports*, 13 [online] Available from: <http://fas.org/sgp/crs/homsec/R41987.pdf>, 2011.
- 5 Lwin, K. K., Zettsu, K. and Sugiura, K.: Geovisualization and correlation analysis between geotagged Twitter and JMA rainfall data: Case of heavy rain disaster in Hiroshima, *Spat. Data Min. Geogr. Knowl. Serv. (ICSDM)*, 2015 2nd IEEE Int. Conf., 71–76, doi:10.1109/ICSDM.2015.7298028, 2015.
- McCall, M. K.: Seeking good governance in participatory-GIS: A review of processes and governance dimensions in applying GIS to participatory spatial planning, *Habitat Int.*, 27(4), 549–573, doi:10.1016/S0197-3975(03)00005-5, 2003.
- 10 Mersham, G.: Social Media and Public Information Management: The September 2009 Tsunami Threat to New Zealand, *Media Int. Aust. Inc. Cult. Policy*, (137), 130–143, doi:10.1177/1329878X1013700115, 2010.
- Perez, P., Chemin, T. H. Du, Turpin, E. and Clarke, R.: Citizen-Driven Flood Mapping in Jakarta: A Self-Organising Socio-technical System, 2015 IEEE Int. Conf. Self-Adaptive Self-Organizing Syst. Work., 174–178, doi:10.1109/SASOW.2015.40, 2015.
- 15 Poser, K. and Dransch, D.: Volunteered geographic information for disaster management with application to rapid flood damage estimation, *Geomatica*, 64(1), 89–98, 2010.
- Sakaki, T.: Earthquake Shakes Twitter Users : Real-time Event Detection by Social Sensors, , 851 – 860, doi:10.1145/1772690.1772777, 2009.
- 20 Sanders, T. G., Ward, R. C., Loftis, J. C., Steele, T. D., Adrian, D. D. and Yevjevich, V.: Design of network for monitoring water quality, Water Resources Publication, Littleton, Colorado., 1983.
- Seeger, C. J.: The role of facilitated volunteered geographic information in the landscape planning and site design process, *GeoJournal*, 72(3-4), 199–213, doi:10.1007/s10708-008-9184-2, 2008.
- Silvertown, J.: A new dawn for citizen science., *Trends Ecol. Evol.*, 24(9), 467–71, doi:10.1016/j.tree.2009.03.017, 2009.
- 25 Slavkovikj, V., Verstockt, S., Van Hoecke, S. and Van De Walle, R.: Review of wildfire detection using social media, *Fire Saf. J.*, 68, 109–118, doi:10.1016/j.firesaf.2014.05.021, 2014.
- Strobl, R. O. and Robillard, P. D.: Network design for water quality monitoring of surface freshwaters: A review, *J. Environ. Manage.*, 87(4), 639–648, doi:10.1016/j.jenvman.2007.03.001, 2008.
- Tang, Z., Zhang, L., Xu, F. and Vo, H.: Examining the role of social media in California’s drought risk management in 2014, *Nat. Hazards*, 79(1), 171–193, doi:10.1007/s11069-015-1835-2, 2015.
- 30 Tencent: WeChat - Features, [online] Available from: [http://www.wechat.com/en/features.html#live\\_chat](http://www.wechat.com/en/features.html#live_chat) (Accessed 9 July 2016), 2016.

Tulloch, D. L.: Is VGI participation? From vernal pools to video games, *GeoJournal*, 72(3-4), 161–171, doi:10.1007/s10708-008-9185-1, 2008.

5 Virtual Social Media Working Group: Lessons learned: Social media and hurricane Sandy, , (June) [online] Available from: [https://communities.firstresponder.gov/DHS\\_VSMWG\\_Lessons\\_Learned\\_Social\\_Media\\_and\\_Hurricane\\_Sandy\\_Formatted\\_June\\_2013\\_FINAL.pdf](https://communities.firstresponder.gov/DHS_VSMWG_Lessons_Learned_Social_Media_and_Hurricane_Sandy_Formatted_June_2013_FINAL.pdf), 2013.

Wang, H., Wu, M., Deng, Y., Tang, C. and Yang, R.: Surface water quality monitoring site optimization for poyang lake, The largest freshwater lake in China, *Int. J. Environ. Res. Public Health*, 11(11), 11833–11845, doi:10.3390/ijerph11111833, 2014.

10 Wei, H.: Officials failing to stop textile factories dumping waste in Qiantang River, *Chinadialogue* [online] Available from: <https://www.chinadialogue.net/article/show/single/en/5589-Officials-failing-to-stop-textile-factories-dumping-waste-in-Qiantang-River> (Accessed 8 January 2013), 2013.

Werts, J. D., Mikhailova, E. a., Post, C. J. and Sharp, J. L.: An integrated WebGIS framework for volunteered geographic information and social media in soil and water conservation., *Environ. Manage.*, 49, 816–832, doi:10.1007/s00267-012-9818-5, 2012.

15 Wikipedia: WeChat, [online] Available from: [https://en.wikipedia.org/wiki/WeChat#cite\\_note-35](https://en.wikipedia.org/wiki/WeChat#cite_note-35) (Accessed 9 July 2016), 2016.

**Figure 1: Positive feedback ring for volunteer's motivation.**

5 **Figure 2: Framework of monitoring water quality by VGI and social media.**

**Figure 3. Distribution of the reports across the provinces and cities in China.**

**Figure 4. Distribution of anonymous reports and photograph reports.**

**Figure 5: Increase in the number of reports and reporters.**

**Figure 6: Distribution of the reports versus reporters.**

10

**Table 2: Number of reports across China**

| No.   | Provinces    | Number of reports |           |              | Assessment | No. | Provinces | Number of reports |           |              | Assessment |
|-------|--------------|-------------------|-----------|--------------|------------|-----|-----------|-------------------|-----------|--------------|------------|
|       |              | Total             | Anonymous | Photographed |            |     |           | Total             | Anonymous | Photographed |            |
| 1     | Henan        | 34                | 19        | 18           | 0.74       | 18  | Guangdong | 1                 | 1         | 0.75         |            |
| 2     | Beijing      | 29                | 23        | 4            | 0.59       | 19  | Guangxi   | 1                 | 1         | 0.77         |            |
| 3     | Jiangxi      | 24                | 4         | 4            | 0.69       | 20  | Guizhou   | 1                 | 1         | 0.77         |            |
| 4     | Shandong     | 16                | 1         | 16           | 0.61       | 21  | Hebei     | 1                 | 1         | 0.73         |            |
| 5     | Shanghai     | 15                | 1         | 7            | 0.74       | 22  | Hunan     | 1                 | 1         | 0.58         |            |
| 6     | Chongqing    | 12                | 6         | 11           | 0.57       | 23  | Jilin     | 1                 | 1         | 0.78         |            |
| 7     | Fujian       | 6                 | 3         | 2            | 0.88       | 24  | Neimeng   | 1                 | 1         | 0.33         |            |
| 8     | Gansu        | 4                 | 2         | 3            | 0.75       | 25  | Ningxia   | 1                 | 1         | 0.80         |            |
| 9     | Yunnan       | 4                 | 1         | 3            | 0.90       | 26  | Shaanxi   | 1                 | 1         | 0.75         |            |
| 10    | Shanxi       | 3                 | 2         | 2            | 0.74       | 27  | Sichuan   | 1                 | 1         | 0.78         |            |
| 11    | Tianjin      | 3                 | 3         | 2            | 0.80       | 28  | Zhejiang  | 1                 | 1         | 0.58         |            |
| 12    | Hubei        | 2                 | 0         | 2            | 0.64       | 29  | Hongkong  | 1                 | 1         | 1.00         |            |
| 13    | Jiangsu      | 2                 | 1         | 2            | 0.77       | 30  | Xinjiang  | /                 | /         | /            |            |
| 14    | Liaoning     | 2                 | 1         | 1            | 0.70       | 31  | Tibet     | /                 | /         | /            |            |
| 15    | Qinghai      | 2                 | 1         | 1            | 0.88       | 32  | Hainan    | /                 | /         | /            |            |
| 16    | Anhui        | 1                 | 1         | 0            | 0.80       | 33  | Taiwan    | /                 | /         | /            |            |
| 17    | Heilongjiang | 1                 | 1         | 0            | 0.55       | 34  | Macau     | /                 | /         | /            |            |
| Total |              |                   |           |              |            |     |           | 172               | 82        | 83           |            |

**Table 3: Examples of reports for pollution disclosure**

| No.      | 1                                                                                 |       |           |        |         | 2                                                                                  |       |           |        |         | 3                                                                                   |       |           |        |         |
|----------|-----------------------------------------------------------------------------------|-------|-----------|--------|---------|------------------------------------------------------------------------------------|-------|-----------|--------|---------|-------------------------------------------------------------------------------------|-------|-----------|--------|---------|
| Report   | Color                                                                             | Smell | Turbidity | Floats | Assess. | Color                                                                              | Smell | Turbidity | Floats | Assess. | Color                                                                               | Smell | Turbidity | Floats | Assess. |
|          | Green                                                                             | 3.0   | 5.0       | 7.0    | VB      | Green                                                                              | 3.0   | 6.0       | 5.0    | VB      | Black                                                                               | 0.0   | 7.0       | 7.0    | B       |
| Photo    | 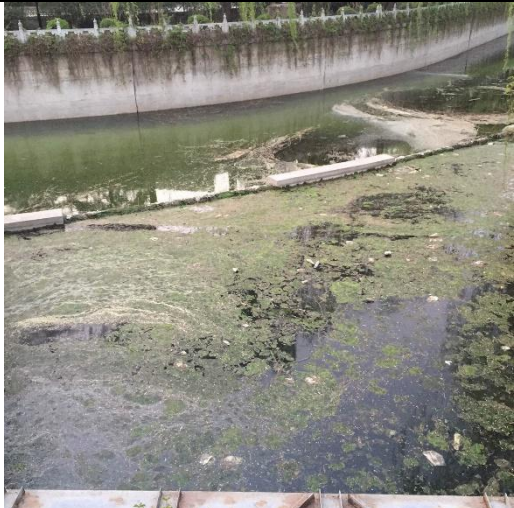 |       |           |        |         |  |       |           |        |         |  |       |           |        |         |
| Date     | April 10, 2016                                                                    |       |           |        |         | April 15, 2016                                                                     |       |           |        |         | May 1, 2016                                                                         |       |           |        |         |
| Location | Tsinghua University, Beijing City, China                                          |       |           |        |         | Fei Town, Linyi City, Shandong Province                                            |       |           |        |         | New coastal area, Tianjin City, China                                               |       |           |        |         |

Note: B means bad; VB means very bad.
